# Supplementary material for: A facile approach for thermal and reduction dual-responsive prodrug nanogels for intracellular doxorubicin delivery
Source: Royal Society of Chemistry journal article supplement (doi:10.1039/c6tb01285j), 2016-01-01
Supplement: c6tb01285j1.pdf [file c6tb01285j1.pdf]

## Electronic Supplementary Information

### A Facile Approach for Thermo and Reduction Dual-Responsive

### Prodrug Nanogels for Intracellular Doxorubicin Delivery

Huan Peng,<sup>a,b†</sup> Xiaobin Huang,<sup>c†</sup> Alex Oppermann,<sup>d</sup> Andrea Melle,<sup>a,b</sup> Lindsey Weger,<sup>a,b</sup> Marcel Karperien,<sup>c</sup> Dominik Wöll<sup>d</sup> and Andrij Pich<sup>a,b\*</sup>

a. Functional and Interactive Polymers, Institute of Technical and Macromolecular Chemistry, RWTH Aachen University, Aachen, Germany.

b. DWI-Leibniz Institute for Interactive Materials e.V., Aachen, Germany.

c. Developmental BioEngineering, MIRA Institute for Biomedical Technology and Technical Medicine, University of Twente, The Netherlands.

d. Institute of Physical Chemistry, RWTH Aachen University, Aachen, Germany.

† These authors contributed equally to this work.

\*Correspondence - pich@dwI.rwth-aachen.de

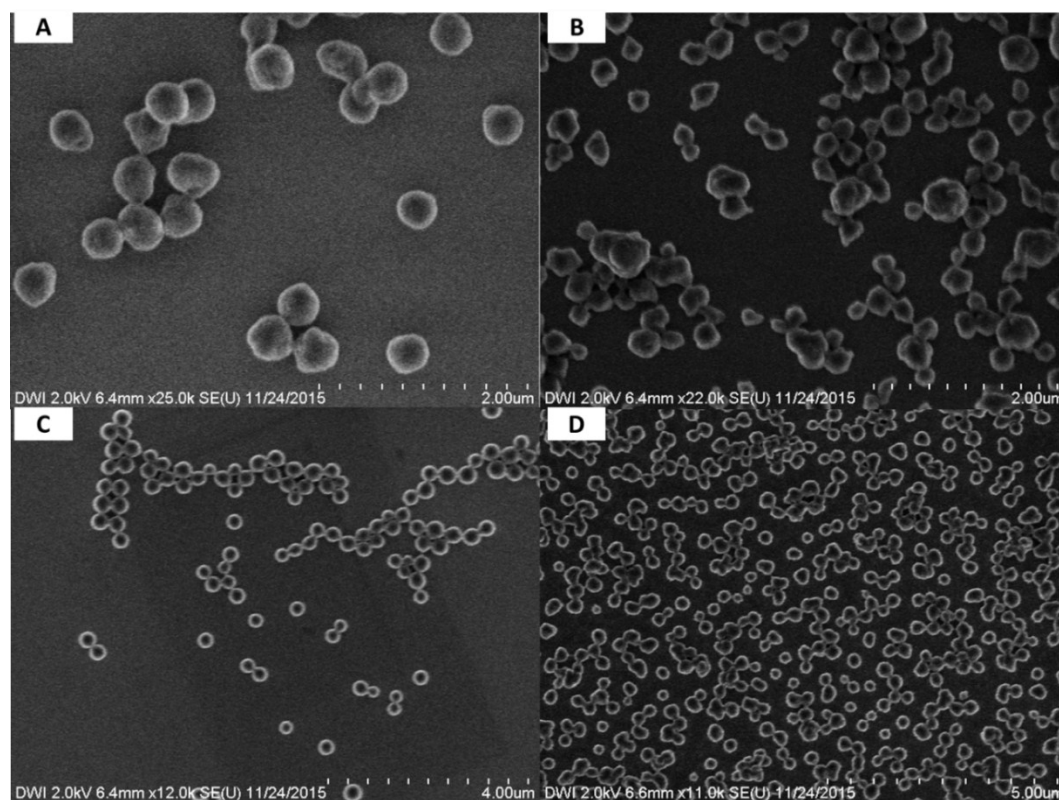

Fig. S1 FESEM images of nanogels prepared with H<sub>2</sub>O/MeCN ratio (v/v) : A) 1, B) 1.5, C) 2, D) 3.

The nanogels were prepared in 150 mL blend solvent with 1.25g PVP ( $M_n \sim 40$  kDa)

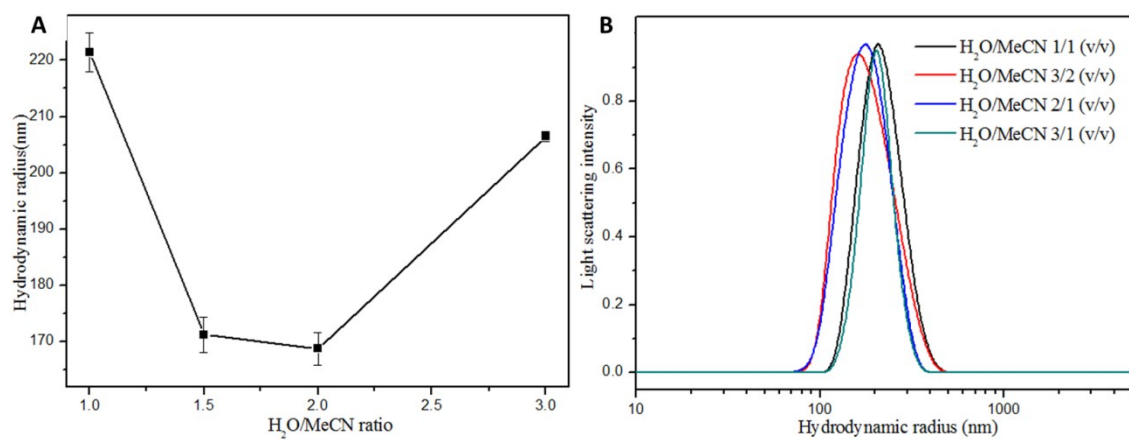

Fig. S2 Hydrodynamic radius (A) and particle size distribution of nanogels prepared with different H<sub>2</sub>O/MeCN ratio measured by DLS. The nanogels were prepared in 150 mL blend solvent with 1.25g PVP ( $M_n \sim 40$  kDa).

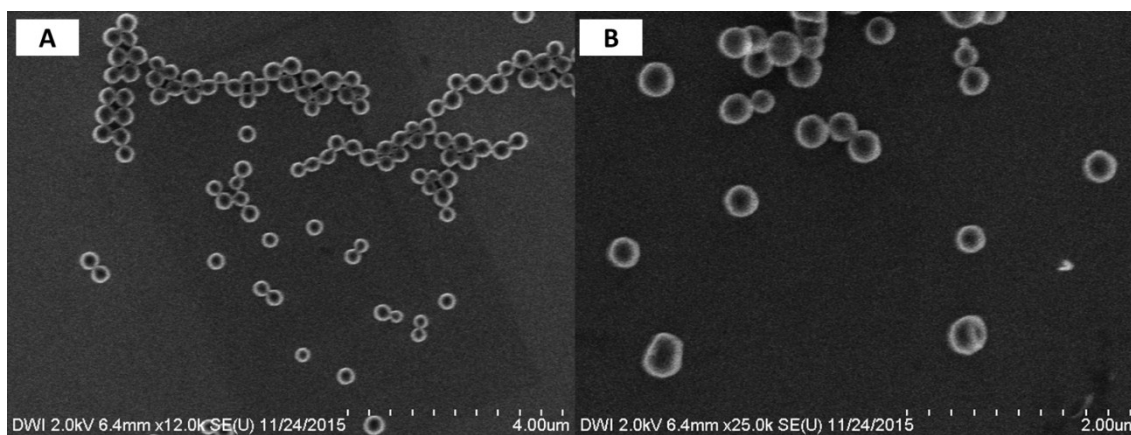

Fig. S3 FESEM images of nanogels (NG) and DOX loaded nanogels (DOX-NG).

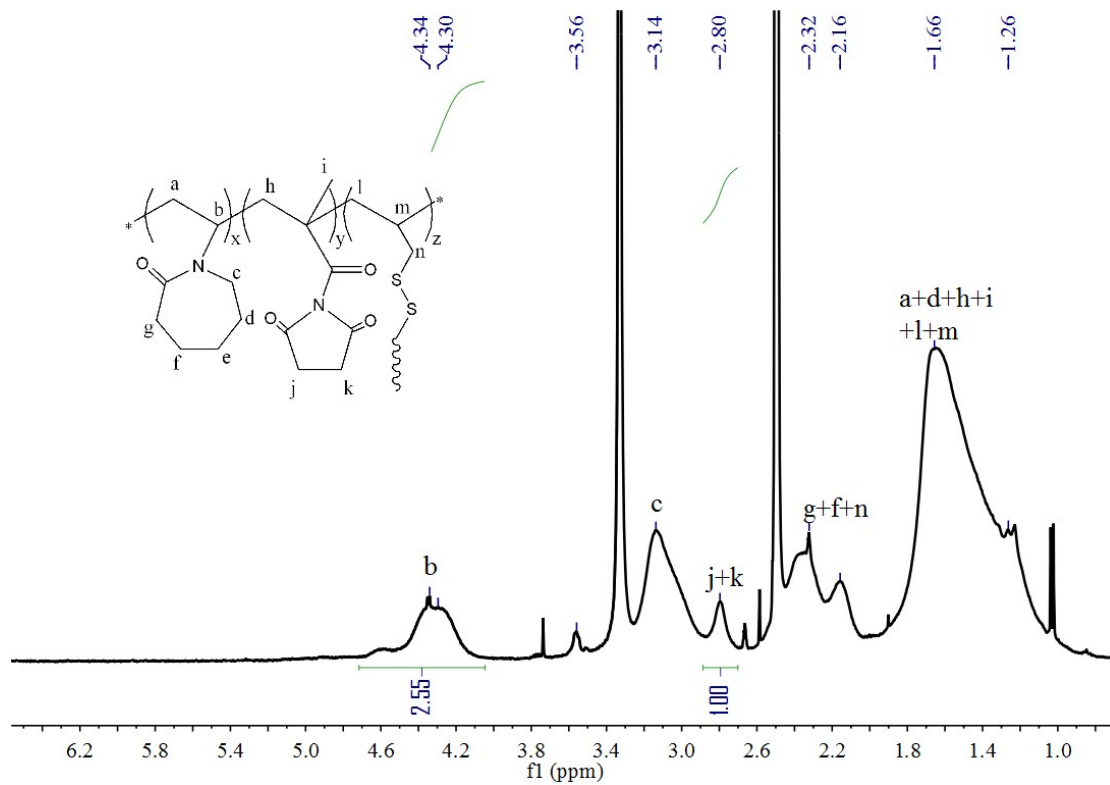

Fig. S4  $^1\text{H}$  NMR of the poly(VCL-co-Suma) Nanogels (NG) in DMSO- $d_6$ .

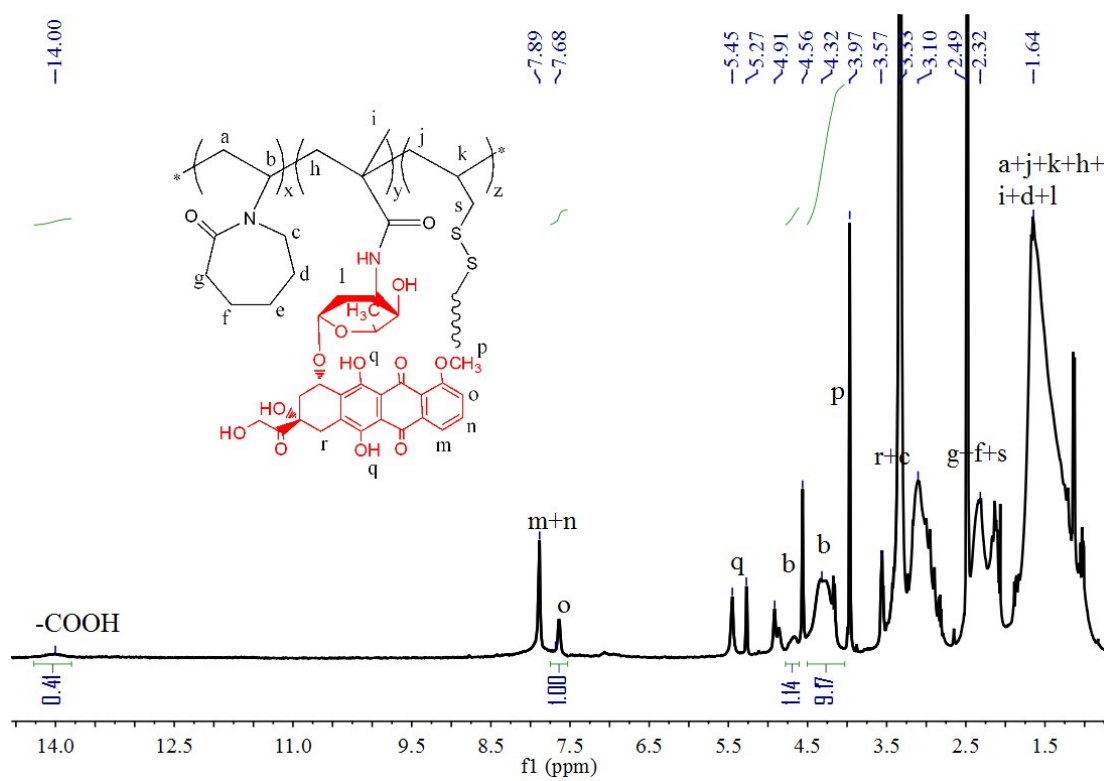

Fig. S5  $^1\text{H}$  NMR of the DOX-NG in DMSO- $d_6$ .

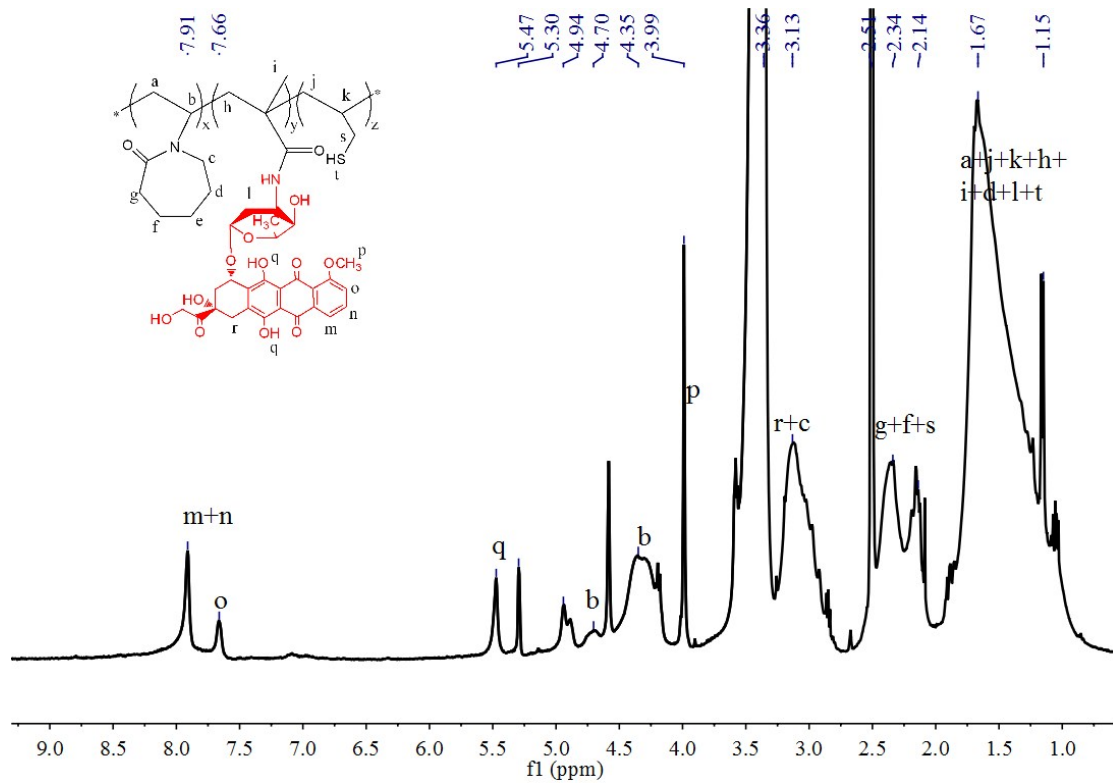

Fig. S6  $^1\text{H}$  NMR of the degradation products of DOX-NG in DMSO- $d_6$ .
